# Supplementary material
Source: publisher figshare collection journal article supplement (https://future-science-group.figshare.com/ndownloader/files/34891920)

**SUPPLEMENTARY MATERIALS**


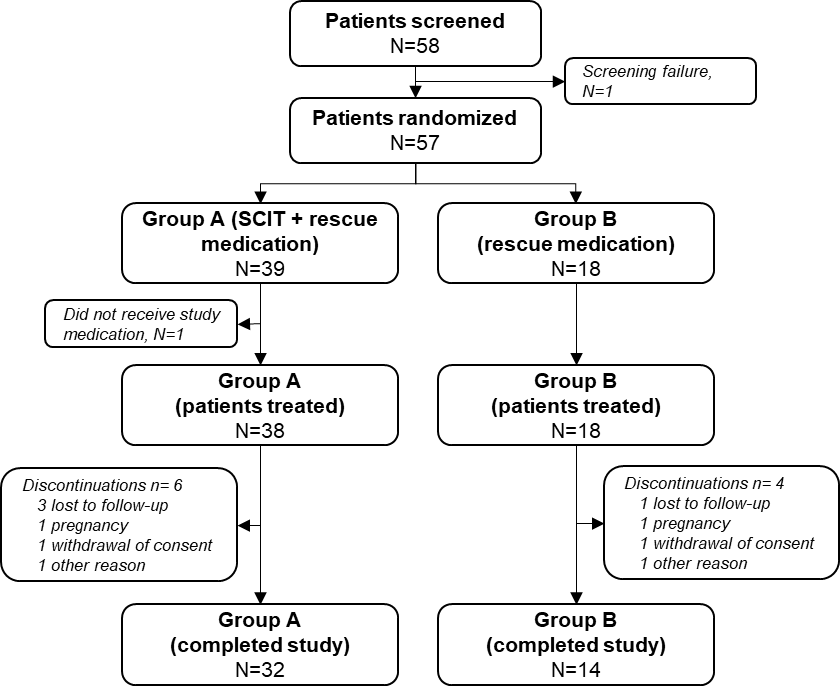


**Supplementary Figure 1.** CONSORT diagram.

Supplement: Supplementary file 1 [file 34891920]
